# Supplementary material for: The effect of aging on the ciliary muscle and its potential relationship with presbyopia: a literature review
Source: PeerJ journal article supplement (doi:10.7717/peerj.18437), 2024-12-24
Supplement: Search_Strategy_in_PubMed.docx [file Search_Strategy_in_PubMed.docx]

Pubmed:

Search: **(((((Ciliary Body[Title/Abstract]) OR (Ciliary Muscle[Title/Abstract])) OR (Aqueous Humor[Title/Abstract])) OR (Zonules[Title/Abstract])) OR (Ciliary Process[Title/Abstract])) AND (((((Age[Title/Abstract]) OR (Presbyopia[Title/Abstract])) OR (accommodation[Title/Abstract])) OR (UBM[Title/Abstract])) OR (OCT[Title/Abstract]))** Filters: **from 1957/1/1 - 2022/2/2**
