# Supplementary material for: The effect of aging on the ciliary muscle and its potential relationship with presbyopia: a literature review
Source: PeerJ journal article supplement (doi:10.7717/peerj.18437), 2024-12-24
Supplement: Table_of_Basic_Information_for_Included_Articles.xlsx [file Table_of_Basic_Information_for_Included_Articles.xlsx]

## Sheet: Sheet1
Number	Title	Year	Author	Type of study	Method
1	Presbyopia: Effectiveness of correction strategies.	2019	James S Wolffsohn	Review	Data Collection
2	Comparing the Effect of Monofocal and Multifocal Intraocular Lenses on Macular Surgery.	2020	A Altun	prospective randomized clinical trial	Patients with symptomatic epiretinal membrane were studied between January 2019 and January 2020. Excluding various eye pathologies, they were divided into monofocal and multifocal intraocular lens groups. Preoperative assessments, including refractive errors, were conducted. Surgical procedures and postoperative follow-ups were performed, with statistical analyses conducted.
3	A comparative evaluation of visual, refractive, and patient-reported outcomes of three extended depth of focus (Edof) intraocular lenses.	2020	Robert Edward Ang	Retrospective cohort study	Retrospective cohort study with EDOF IOL recipients recruited from January to June 2019. Inclusion criteria: Symfony, IC-8, or WIOL-CF IOLs implanted, uncomplicated phacoemulsification, 1-month post-op visit. Exclusions: corneal abnormalities, retinal disorders, glaucoma, refractive surgery history.
4	A prospective study with a multifocal intraocular lens. Medical Hypothesis, Discovery, and Innovation in Ophthalmology.	2020	German Roberto Bianchi	prospective study	This prospective non-randomized case-series study assessed the safety and efficacy of the FullRange pseudophakic intraocular lens (IOL) in programmed cataract surgery patients from October 2017 to May 2018, with 12-month follow-up. Patients with specific cataract grades were included after ethical approval and informed consent. Preoperative evaluations included OCT and Pentacam. Surgical techniqu…
5	Intraocular lens correction of presbyopia.	2019	Rebecca Sieburth	Review	Data Collection
6	Visual Outcomes and Optical Quality of Accommodative, Multifocal, Extended Depth-of-Focus, and Monofocal Intraocular Lenses in Presbyopia-Correcting Cataract Surgery: A Systematic Review and Bayesian Network Meta-analysis.	2022	Jeong-Yeon Cho	Systematic Review and Bayesian Network Meta-analysis	Data Collection
7	Long-term efficacy, visual performance and patient reported outcomes with a trifocal intraocular lens: A six-year follow-up.	2021	Joaquín Fernández	retrospective and cross-sectional study	This retrospective and cross-sectional study conducted during the COVID-19 pandemic period followed European Medicines Agency recommendations. Two stages: phone PRO evaluations for 839MP IOL patients (Mar 2014-Jun 2015), then visual performance measurements at the center. Approved by the Ethics Committee of Research, Almería Center, Torrecardenas Hospital Complex (QV-20-02). Oral consent obtained…
8	Comparison of the accommodation theories of Coleman and of Helmholtz by finite element simulations.	2005	Heiner Martin	research article	Generated axisymmetric static finite element lens model using literature data. Calculated lens refractive power for ages 29 and 45.
9	The shape of the human lens nucleus with accommodation.	2007	Erik Hermans	a biomechanical and optical modeling study	The study involved five healthy subjects aged 16 to 32 years. Anterior eye segment images were captured using a Scheimpflug camera modified with a CCD-camera. Ocular measurements were taken using IOL Master and IRX3 aberrometer. Pupil dilation and fixation procedures were followed to capture images of the eye's nucleus. Accommodation was induced and measured using a lens in front of the left eye.…
10	Zinn's zonule.	2021	Bassnett S.	Review	Data Collection
11	Anterior chamber optical coherence tomography study of human natural accommodation in a 19-year-old albino.	2004	Georges Baikoff	Case report	A 19-year-old albino patient in whom an anterior segment exploration procedure was performed being stretched during accommodation. with an optical coherence tomography (OCT) device.
12	The zonula, lens, and circumlental space in the normal iridectomized rhesus monkey eye.	2006	Mary Ann Croft	a scientific research article	Circumlental space （CLS） measured in living rhesus monkey eyes (n=34) aged 5.7-26 years, at rest and during accommodation. Zonular orientation qualitatively assessed. Analysis correlated CLS changes with age and accommodative amplitude.
13	Ultrasound biomicroscopy of the anterior segment in patients with primary congenital glaucoma: a review of the literature.	2022	Janssens R	Literature Review	Data Collection
14	Diagnostic imaging of the ciliary body: Technologies, outcomes, and future perspectives.	2022	José Ignacio Fernández-Vig	Literature Review	Data Collection
15	Anterior segment optical coherence tomography.	2018	Marcus Ang	Review	Data Collection
16	Imaging of the Ciliary Body: A Major Review. Semin Ophthalmol.	2022	Warjri GB	Review	Data Collection
17	Age-related changes in human ciliary muscle and lens: a magnetic resonance imaging study.	1999	S A Strenk	a research article	The method employs high-resolution MRI to study ciliary muscle contraction and lens response without obscuring vision. MRI offers clear images of the eye's anterior portion, aiding direct imaging during accommodation. Challenges include resolution and SNR limitations, image acquisition time, and the need for controlled head and eye movements
18	Magnetic resonance imaging of the anteroposterior position and thickness of the aging, accommodating, phakic, and pseudophakic ciliary muscle	2010	Susan A Strenk	a research article	High-resolution MRI was used to study ciliary muscle and lens changes during accommodation and aging in phakic and pseudophakic eyes. Images were obtained from 32 phakic and 8 pseudophakic subjects, aged 22 to 91 years, assessing muscle position and thickness.
19	Eye organogenesis: A hierarchical view of ocular development.	2019	Miesfeld JB	Review	Data Collection
20	The effect of ageing on in vivo human ciliary muscle morphology and contractility.	2011	Amy L Sheppard	a prospective study	Study recruited 79 subjects (age 19-70) to analyze ciliary muscle characteristics from incipient presbyopia onwards. Cohorts included young (n=17, mean 25.8 yrs) and older (n=29, mean 46.3 yrs) participants. Subjects with refractive errors amenable to correction with soft contact lenses were included. Ethics approval was obtained.
21	Anatomy of Ciliary Body, Ciliary Processes, Anterior Chamber Angle and Collector Vessels.	2013	Adriana Silva Borges G	Review	Data Collection
22	Autonomic control of the eye.	2015	David H McDougal	Review	Data Collection
23	Computer-animated model of accommodation and presbyopia.	2015	Goldberg DB	Experimental study	The CAMA 2.0 computer-animated model of accommodation and presbyopia was produced in collaboration with an experienced medical animator using Autodesk Maya animation software and Adobe After Effects.
24	Aqueous humor dynamics: a review.	2010	Goel M	Review	Data Collection
25	Basic physiology of the drainage of aqueous humor.	1977	Bill A	a scientific research	Male and female vervet monkeys underwent anterior chamber cannulation. Infusion of mock aqueous humor containing labeled albumin at 15-30 µl/min. External circuit, including a gamma detector, circulated fluid at 75 µl/min. Outlet above eye maintained elevated IOP. Corrections made for background, isotope interference, and labeled material adsorption. Temperature variations had negligible impact o…
26	Uveoscleral drainage of aqueous humour in human eyes.	1977	Bill A	a clinical study	In this study, observations were conducted on human eyes at the Royal Eye Hospital in England. Patients were informed and consented to procedures. Mydriatics were administered for fundus examination. Local anesthesia was induced, followed by incisions and cannula insertion into the anterior chamber. Aqueous humor was mixed with labeled albumin. After recannulation, chamber contents were washed ou…
27	Presbyopia and Glaucoma: Two Diseases, One Pathophysiology?	2019	Paul L. Kaufman	Review	Data Collection
28	Age-related changes in human ciliary muscle.	2000	M T Pardue	Experimental study	Eyes from donors aged 1-107 treated with atropine/pilocarpine, analyzed for effects on ciliary muscle via light microscopy. Morphometric measurements assessed muscle dimensions, fiber group area, and connective tissue percentage. Results showed age-related changes in muscle morphology.
29	Analysis of human crystalline lens curvature as a function of accommodative state and age.	1984	J F Koretz	a retrospective research	Slit-lamp photos (ages 11-45) analyzed via digitization. Curvature changes during accommodation assessed through curve-fitting (742 curves). Patterns revealed across different ages and accommodative states.
30	How the human eye focuses.	1988	J F Koretz	a scientific research	A mathematical model of the lens body was created, focusing on a 10-year-old lens. Assumptions were made about its elasticity, responding differently to stress. The lens structure, zonular attachment, nucleus, cortex, and fiber growth were analyzed
31	The mechanism of presbyopia.	2005	Susan A Strenk	Review	Data Collection
32	Age-related changes of the human ciliary muscle. A quantitative morphometric study.	1992	S Tamm	A quantitative morphometric study	Histological examination of ciliary muscle changes (33-87 years) in 85 melanoma and 10 normal eyes. Assessed total area/length, section areas, and inner apex distance to scleral spur, correlating with age. Found age-related decrease in total muscle area/length, especially in longitudinal portion, indicating potential implications for the lens paradox.
33	The Effect of Age, Accommodation, and Refractive Error on the Adult Human Eye.	2016	Kathryn Richdale	a cross-sectional observational study	Subjects (n=91), aged 30-50, phakic, with minimal cataracts. Excluded strabismic, amblyopic, or vision therapy history. Emmetropic or soft contact lens wearers, correctable to 20/25, <1.25D astigmatism. Excluded pregnant/breastfeeding or systemic diseases. Met 7T MRI safety criteria.Accommodation was measured subjectively with a push-up test and objectively using open-field autorefraction. Regres…
34	Ultrasound biomicroscopy of the aging rhesus monkey ciliary region.	2001	A Glasser	a scientific research	Ultrasound biomicroscopy assessed age-related changes in rhesus monkey ciliary region. Monkeys were anesthetized, cyclopleged, and imaged. Objective morphometric measurements included ciliary body parameters. Circumlental space decreased with age in the temporal quadrant. Other parameters showed no age correlation but exhibited significant nasal-temporal differences. Posterior zonular fibers freq…
35	Extralenticular and lenticular aspects of accommodation and presbyopia in human versus monkey eyes.	2013	Mary Ann Croft	a comparative observational study	Pharmacological induction in humans (12 subjects, ages 19-65) and midbrain electrical stimulation in rhesus monkeys (11 subjects, ages 6-27). Ultrasound biomicroscopy captured images. Distances were measured at rest and during accommodation. Stepwise regression analyzed predictors.
36	Anterior shift of zonular insertion onto the anterior surface of human crystalline lens with age.	1998	I Sakabe	an experimental cadaveric eye study	cadaveric eyes (223, 16-100 years) were studied. Zonular insertion onto the anterior capsule was examined using modified photographic techniques. Distances to lens equator, ciliary sulcus, lens and ciliary sulcus diameters, and axial globe length were measured.
37	Ocular rigidity: biomechanical role, in vivo measurements and clinical significance. Clinical & experimental ophthalmology.	2013	Efstathios T Detorakis	a scientific research	Rhesus monkeys were anesthetized, cyclopleged, and imaged using ultrasound biomicroscopy. Objective morphometric measurements of ciliary body parameters were conducted, revealing age-related changes and significant nasal-temporal differences. Findings suggest implications for convergence-associated accommodation.
38	Accommodative movements of the vitreous membrane, choroid, and sclera in young and presbyopic human and nonhuman primate eyes.	2013	Mary Ann Croft	a comparative observational study	Studied dynamic intraocular movements in rhesus monkeys (n=11, ages 6-27 years) and humans (n=12, ages 19-65 years). Accommodation induced pharmacologically in humans and by electrical stimulation in monkeys. Utilized ultrasound biomicroscopy, endoscopy, and contrast agents for imaging.
39	Extracellular matrix in aged human ciliary body: an immunoelectron microscope study.	1992	G E Marshall	a histological analysis study	Tissue from nine human eyes (ages 52-78 yr) was used to investigate the fine structural distribution of collagens I-VI and laminin in the ciliary body using the immunogold antibody labeling technique.
40	Age-related loss of morphologic responses to pilocarpine in rhesus monkey ciliary muscle.	1988	E Lütjen-Drecoll	a scientific research	Study conducted on rhesus monkeys and humans to analyze ciliary muscle dynamics and connective tissue distribution. Various treatments induced changes, measured using light microscopy.
41	Surgical intervention and accommodative responses, II: forward ciliary body accommodative movement is facilitated by zonular attachments to the lens capsule.	2008	Rainer Wasilewski	a research article	The study utilized in vivo data collected through UBM imaging, employing consistent procedures as reported by Croft et al. The research focused on 14 rhesus monkeys, aged 6-27 years, all with bilaterally iridectomized eyes. Accommodation was induced using a bipolar electrode, with monkeys grouped into Young (6-13 years) and Older (17-26 years) categories based on age. Surgical interventions, incl…
42	Anterior zonular shifts with age.	1979	P N Farnsworth	a scientific research	This article outlines a methodological approach for preparing and analyzing normal human eye specimens for scanning electron microscopy. Eyes were fixed in glutaraldehyde, dissected, dehydrated, coated with gold-palladium, and examined. Data from lenses without abnormalities were analyzed. Method includes fixation, dissection, dehydration, coating, and SEM examination.
43	The action of ciliary muscle contraction on accommodation of the lens explored with a 3D model. Biomechanics and modeling in mechanobiology.	2021	Katherine R Knaus	a scientific research article	The study developed a Finite Element Model (FEM) to simulate ciliary muscle actions on lens displacement during accommodation. FEM included three muscle sections with independent activation. Model inputs were calibrated to replicate experimental data. Analyses showed synergistic actions of muscle sections in lens deformation and position modulation. Results elucidate the complex mechanics of cili…
44	Assessing accommodative presbyopic biometric changes of the entire anterior segment using single swept-source OCT image acquisitions.	2022	Xiaobin Xie	prospective observational case series	The study utilized swept-source AS-OCT to assess anterior chamber changes during accommodation and presbyopia. Images were obtained from 71 volunteers, evaluating ciliary muscle, lens parameters, and other factors. ANOVA analysis explored accommodative stimuli effects, age, and refractive status. Findings revealed increased ciliary muscle thickness with stimuli, differing effects based on age, an…
45	Age-related loss of ciliary muscle mobility in the rhesus monkey. Role of the choroid.	1992	E Tamm	a histological study	Rhesus monkey eyes (aged 6-29 years) were studied by bisecting them meridionally and incubating halves in atropine sulfate or pilocarpine hydrochloride. Histologic analysis compared ciliary muscle sections from cut margins and midsections. Pilocarpine's effect on muscle topography diminished with age in intact muscle sections, suggesting decreased posterior attachment compliance as a cause of age…
46	The zonule of Zinn: its origin, course, and insertion, and its relation to neighboring structures.	1954	Clement McCulloch	Review	Data Collection
47	Surgical intervention and accommodative responses, I: centripetal ciliary body, capsule, and lens movements in rhesus monkeys of various ages.	2008	Mary Ann Croft	a scientific research	Accommodative changes were studied in rhesus monkey eyes (n=18, aged 6-27 years) via Edinger-Westphal nucleus stimulation. Goniovideography tracked lens/capsule and ciliary process movements pre/post lens extraction (ICLE, ECLE), and zonulolysis. Image analysis quantified movement velocities. Results show enhanced movements post-ECLE and dampened post-ICLE in disrupted vitreous.
48	The effect of cataract extraction on the contractility of ciliary muscle.	2008	Kyung-Ah Par	a prospective interventional case series	Phacoemulsification and intraocular lens implantation were performed in 23 eyes. Ultrasound biomicroscopy assessed ciliary muscle contractility with and without pilocarpine before and after surgery. Changes in axial length of the ciliary body (CBAXL) were measured and compared visually using Adobe Photoshop 7.0.
49	Ultrasound biomicroscopy value in evaluation of restoration of ciliary muscles contractility after cataract extraction.	2017	Ayser Abd El-Hameed Fayed	prospective study	Patients aged 48-70 with cataracts underwent ophthalmic exams. Exclusions: vision-affecting conditions, corneal irregularities, severe refraction, capsular perforation, or age <35. Phacoemulsification with AcrySof SA60AT implantation was performed. UBM assessed ciliary muscle response to pilocarpine. Parameters included ciliary muscle width, length, ACD, CBAXL, and SCPA. Analysis followed Pavlin …
50	Morphology and accommodative function of the vitreous zonule in human and monkey eyes.	2010	Elke Lütjen-Drecoll	an exprimental study	Monkey eyes analyzed via SEM after perfusion fixation. Anterior globe sectors prepared for SEM. Customized methods used for vitreous membrane and zonule visualization.
51	Accommodative movements of the lens/capsule and the strand that extends between the posterior vitreous zonule insertion zone & the lens equator, in relation to the vitreous face and aging.	2016	Mary Ann Croft	a research study	Studied 12 humans (ages 19-65) and 12 monkeys (ages 6-27). Induced accommodation in humans pharmacologically and in monkeys electrically. Utilized ultrasound biomicroscopy and surgical techniques for intraocular imaging.
52	Age-related posterior ciliary muscle restriction - A link between trabecular meshwork and optic nerve head pathophysiology.	2017	Mary Ann Croft	a hypothesis-driven discussion	Data Collection
53	Accommodative movements of the choroid in the optic nerve head region of human eyes, and their relationship to the lens.	2022	Mary Ann Croft	a clinical research study	Twelve normal human subjects (aged 18–51 yrs) with refractive error within 2 diopters of emmetropia were examined. Subjects met Snellen criterion of 20/40 or better vision. Exclusions included anisometropia ≥ 2 diopters, significant astigmatism (>0.75 D), oculomotor imbalance, or systemic/ocular conditions affecting pupil dilation or intraocular pressure.
54	An experimental study of the elastic properties of the human Bruch's membrane-choroid complex: relevance to ageing.	2006	M Ugarte	An experimental study	Hydrostatic pressures applied to Bruch's membrane-choroid complexes from human donors (21–97 years). Two AMD-affected samples (85, 95) showed pathology. Optical coherence tomography recorded tissue deformation, elasticity, and hysteresis under pressure.
55	Posterior attachment of ciliary muscle in young, accommodating old, presbyopic monkeys.	1991	E Tamm	a scientific research	The authors examined posterior ciliary muscle attachments in young and old rhesus monkeys. They used light and electron microscopy to analyze elastic tendons' structure and connections. Structural changes in older monkeys were noted, including thickened tendons with increased microfibrils and collagen fibrils. These changes may contribute to decreased ciliary muscle compliance and presbyopia.
56	The cisternal anatomy of the vitreous body.	1987	W L Jongebloed	a scientific research	Fresh eye vitreous bodies, devoid of surrounding tissues, were submerged and injected with ink for internal visualization. After subaqueous dissection and mounting on silicon rubber, specimens were processed for SEM analysis using a JEOL SEM type 35 c at 15 or 25 kV.
57	Rheological Properties and Age-Related Changes of the Human Vitreous Humor.	2018	Nguyen K Tram	a scientific research	Porcine eyes (n = 15) were obtained post-mortem, and vitreous extracted within 2-4 hours. Human vitreous (n = 39) was obtained within 48 hours post-mortem. Samples were tested on a rheometer at 37°C within 4 hours of extraction. Sandpaper was used to prevent slippage, and testing occurred in a humidifying chamber to mimic in vivo conditions. Solid and liquid phases of vitreous were tested separat…
58	Intraocular accommodative movements in monkeys; relationship to presbyopia.	2022	Mary Ann Croft	An experimental study	Ten rhesus monkeys were selected, including six bilaterally iridic and four bilaterally iridectomized individuals. Bipolar stimulating electrodes were inserted into the midbrain to induce accommodation. Two iridectomized monkeys underwent lens extraction, followed by imaging using ultrasound biomicroscopy. All procedures adhered to ethical guidelines.
59	Observation of Ciliary Body Changes during Accommodation Using Anterior OCT.	2018	Mahmoud Mohamed Farouk	a prospective, observational, noncomparative case series	This study included 18 eyes of 9 children (8 males and 1 female) aged from 4 to 10 years. Ciliary body thickness (CBT) was measured temporally by Anterior OCT at 1, 2 and 3 mm posterior to the scleral spur. Measurements were performed in the accommodated state and the unaccommodated state (with cycloplegia).
60	Changes in ciliary muscle thickness during accommodation in children.	2012	Helen Annie Lewis	a cross-sectional observational study	Children (6-12 years) enrolled. Accommodative response measured. Optical coherence tomography used to image ciliary muscle during varied stimuli. Cycloplegic images captured. Ciliary muscle thickness measured at specific points. Correlations between accommodative response and muscle thickness analyzed.
61	Measuring changes in ciliary muscle thickness with accommodation in young adults.	2012	Laura Ashley Lossing	a methodological study	This study developed a measurement protocol using Zeiss Visante™ AS-OCT to assess ciliary muscle changes during accommodation. 25 adults aged 23 to 28 years participated. Ciliary muscle imaged at two visits, accompanied by PowerRefractor monitoring. Thickness measured at different points during distance and 4.00 D stimulus viewing. Significant changes observed in ciliary muscle thickness. The com…
62	Age does not affect contractile responses of the isolated rhesus monkey ciliary muscle to muscarinic agonists.	1993	J F Poyer	a scientific research study	The study examined ciliary muscle contraction in rhesus monkeys using cholinergic agonists. It assessed responses in both longitudinal and coronal vectors and explored factors influencing age-related changes.
63	Age changes in rhesus monkey ciliary muscle: light and electron microscopy.	1988	E Lütjen-Drecoll	a histological and electron microscopic study	Study examined ciliary muscle morphology across ages in rhesus monkeys via light and electron microscopy. Found structural changes from 6 years, increasing with age. Implications for presbyopia.
64	Ciliary muscle muscarinic binding sites, choline acetyltransferase, and acetylcholinesterase in aging rhesus monkeys.	1990	B T Gabelt	a scientific research article	Ciliary muscle tissues from 54 rhesus monkeys were studied for receptor-binding and enzyme determinations. Animal ages ranged from 1-34 years. Eyes were obtained post-mortem, processed promptly, and conformed to ARVO guidelines. Some eyes had prior interventions like iridectomy or drug administration.
65	Computer-animated model of accommodation and theory of reciprocal zonular action.	2011	Daniel B Goldberg	a scientific research article	This study involved creating a computer-animated model of accommodation using Autodesk® 3D studio MAX® and Adobe® Photoshop for modeling, shading, and lighting. Animation was done to illustrate eye movements. An experienced medical animator collaborated on the project. Anatomical details were based on literature review and ultrasonic biomicroscopy (UBM) findings. The model was not scaled but aime…
66	A new look at an old problem: 3D modeling of accommodation reveals how age-related biomechanical changes contribute to dysfunction in presbyopia	2024	Katherine R Knaus	a scientific research article	The study employs a finite element model (FEM) to simulate the effects of age-related changes in the biomechanical properties of the eye's components, such as the lens, sclera, and ciliary muscle, on accommodative function.
67	Accommodative movements of the vitreous membrane, choroid, and sclera in young and presbyopic human and nonhuman primate eyes	2013	Mary Ann Croft	a biomedical research article	This study first observed accommodative movements of the vitreous and choroid, and age-related scleral changes in monkeys and humans. It found that the anterior hyaloid membrane and sclera move with accommodation and age, respectively. These insights could inform future understanding of accommodation and presbyopia treatments.
68	Real-time ultrasound elastographic imaging of ocular and periocular tissues: a feasibility study.	2010	Efstathios T Detorakis	a medical research article	This article enrolled 5 subjects (22-75 years) with one blind eye; performed ultrasound elastography using a 7-13 MHz probe; recorded strain grayscale and color elastographic maps; quantitatively assessed signal intensity for specific anatomical structures.
69	Qualitative effect of zonular tension on freshly extracted intact human crystalline lenses: implications for the mechanism of accommodation	2004	Ronald A Schachar	a scientific research article	The study examines the impact of zonular tension on the anterior surface of human lenses. Using topography on seven lenses, it found that increasing zonular tension steepens the lens center and flattens the periphery along the applied meridian, while reducing tension has the opposite effect. This contradicts Helmholtz's accommodation theory.
